# Supplementary material for: Construction of self-supported bimetallic MOF-mediated hollow and porous tri-metallic selenide nanosheet arrays as battery-type electrodes for high-performance asymmetric supercapacitors
Source: Royal Society of Chemistry journal article supplement (doi:10.1039/d1ta06209c), 2021-01-01
Supplement: d1ta06209c1.pdf [file d1ta06209c1.pdf]

**Supporting Information**

**Construction of self-supported bimetallic MOFs mediated hollow and porous tri-metallic selenide nanosheet arrays as battery-type electrode for high-performance asymmetric supercapacitors**

Jiwan Acharya<sup>a,b</sup>, Gunendra Prasad Ojha<sup>a,b</sup>, Bishweshwar Pant<sup>a,b</sup>, Mira Park<sup>a,b\*</sup>

<sup>a</sup>Carbon Composite Energy Nanomaterials Research Center, Woosuk University,

Wanju, Chonbuk, 55338, Republic of Korea

<sup>b</sup>Woosuk Institute of Smart Convergence Life Care (WSCLC), Woosuk University,

Wanju, Chonbuk, 55338, Republic of Korea

\*Corresponding author:

Mira Park, E-mail: [wonderfulmira@woosuk.ac.kr](mailto:wonderfulmira@woosuk.ac.kr)

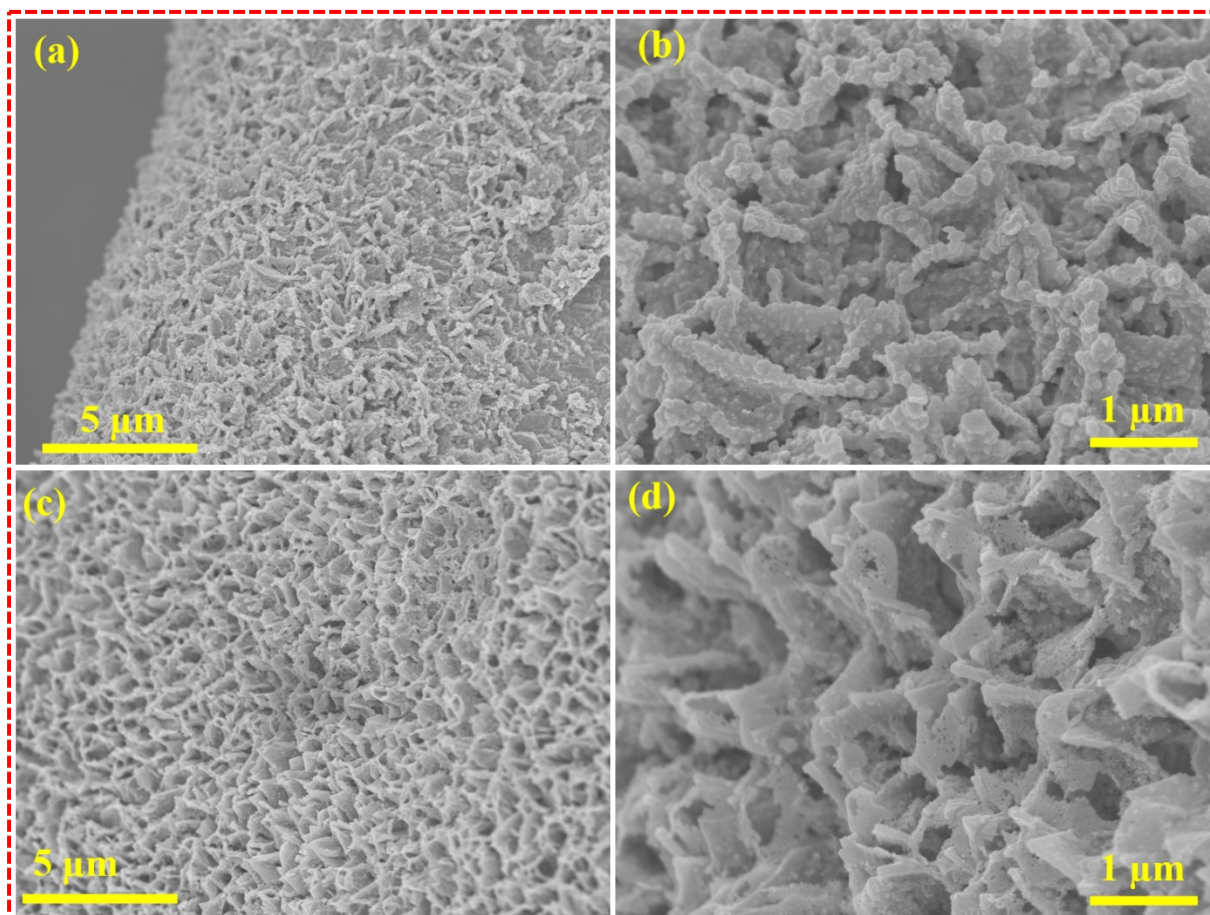

*Fig. S1. FESEM images of (a, b) Co-Se@rGO/NF, and (b) Zn-Co-Se@rGO/NF.*

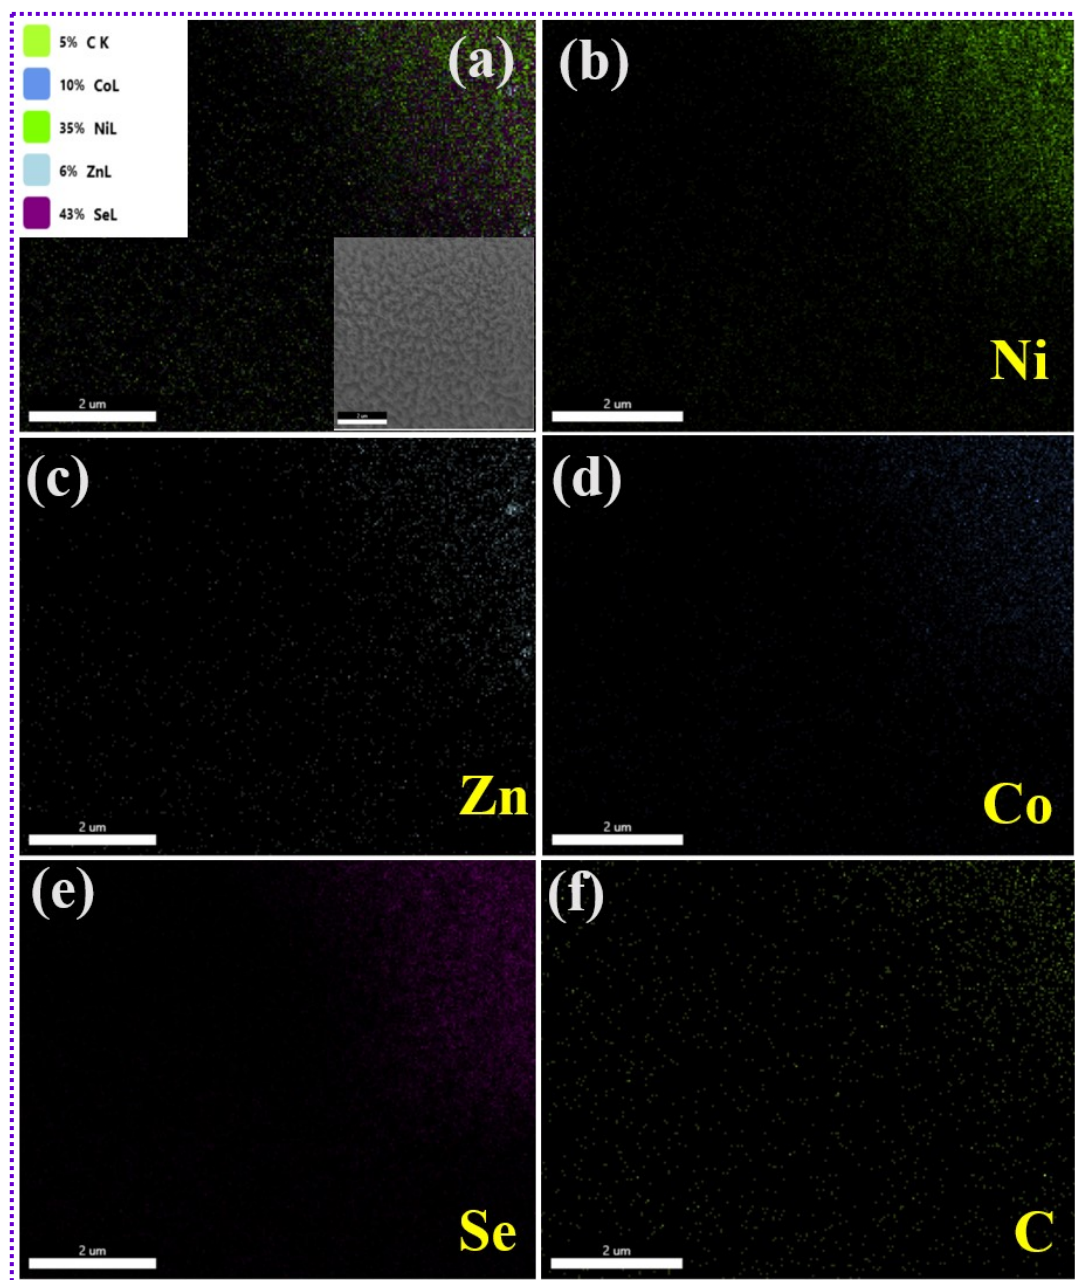

*Fig. S2. EDS color mapping and elemental ratio of various elements present in as-fabricated Ni-Zn-Co-Se@rGO/NF nanomaterials.*

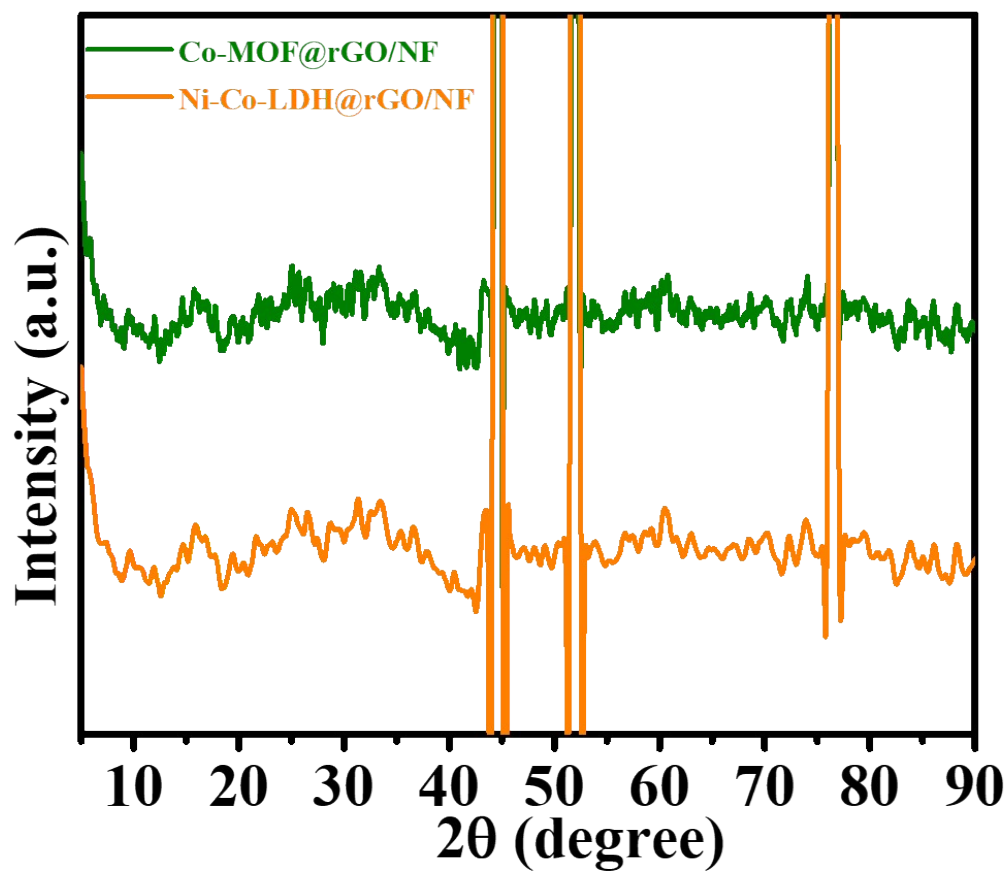

*Fig. S3. XRD pattern of Co-MOF@rGO/NF, and Ni-Co-LDH@rGO/NF.*

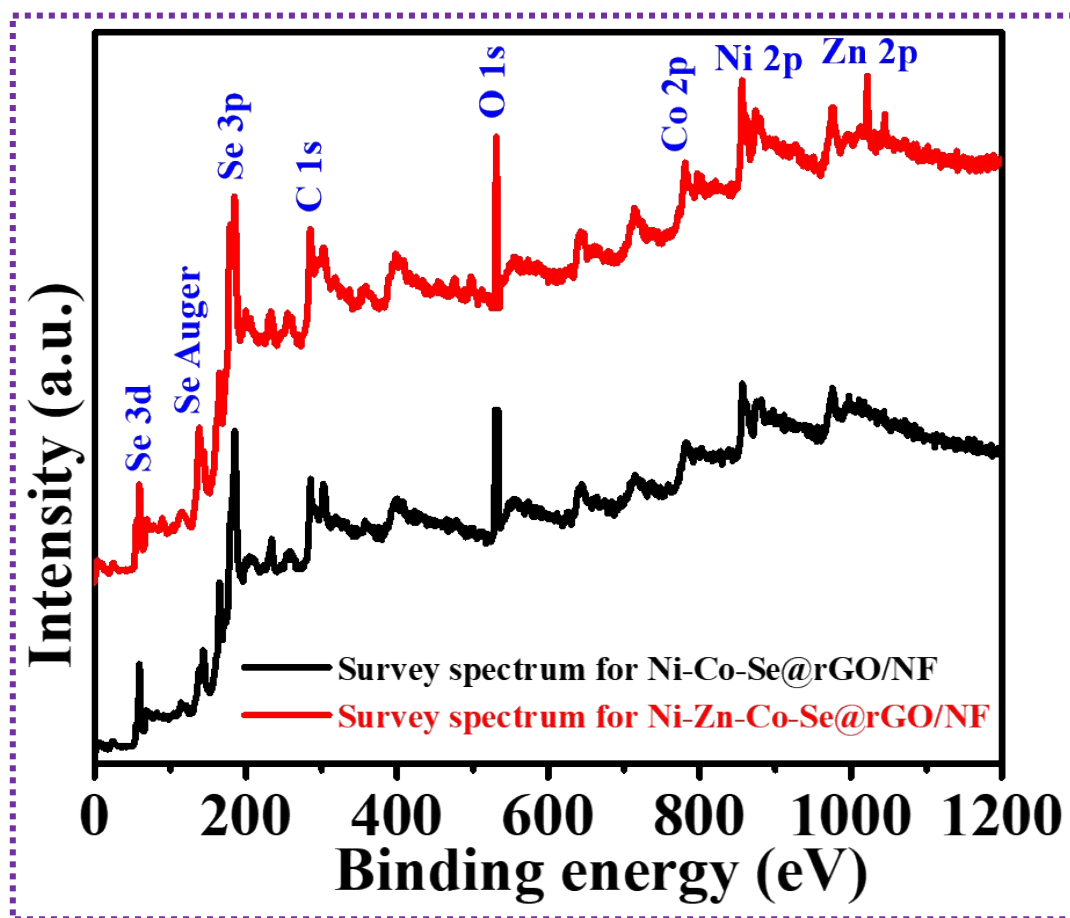

Fig. S4. XPS survey spectra of Ni-Co-Se@rGO/NF and Ni-Zn-Co-Se@rGO/NF.

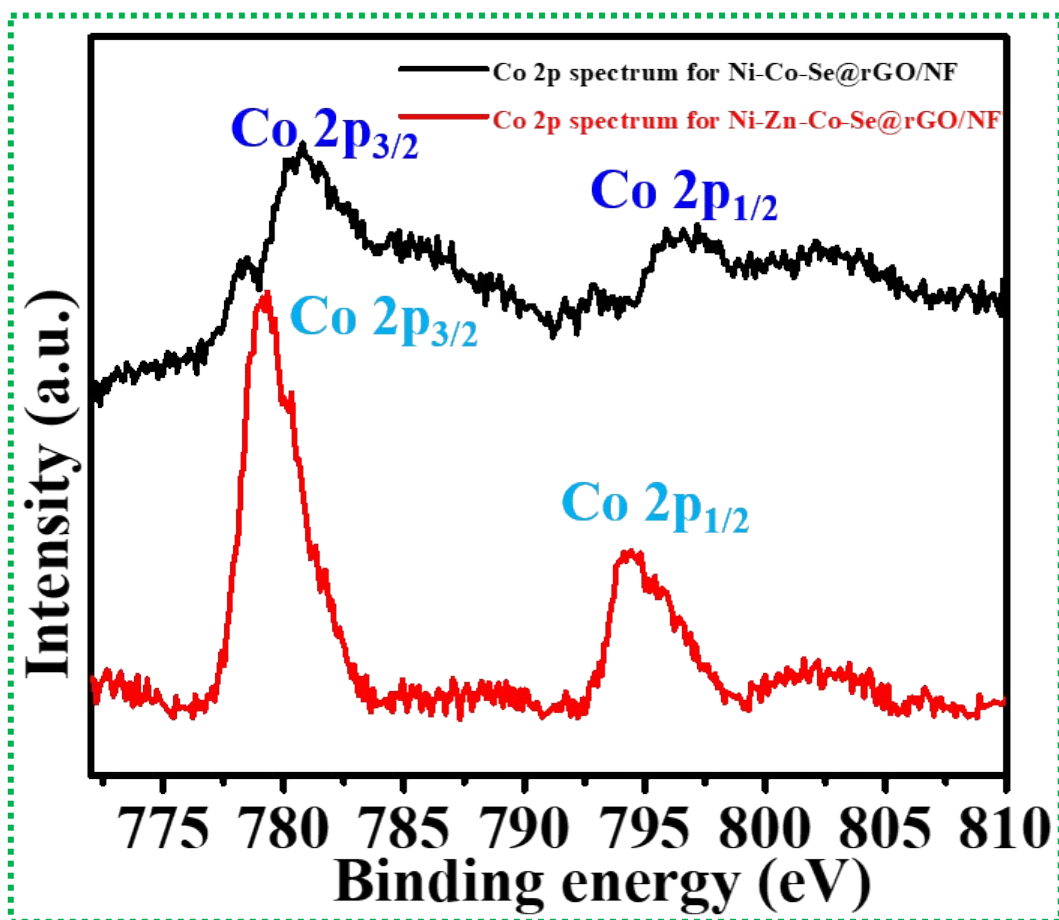

Fig. S5. HR-spectra of Co 2p for Ni-Co-Se@rGO/NF and Ni-Zn-Co-Se@rGO/NF..

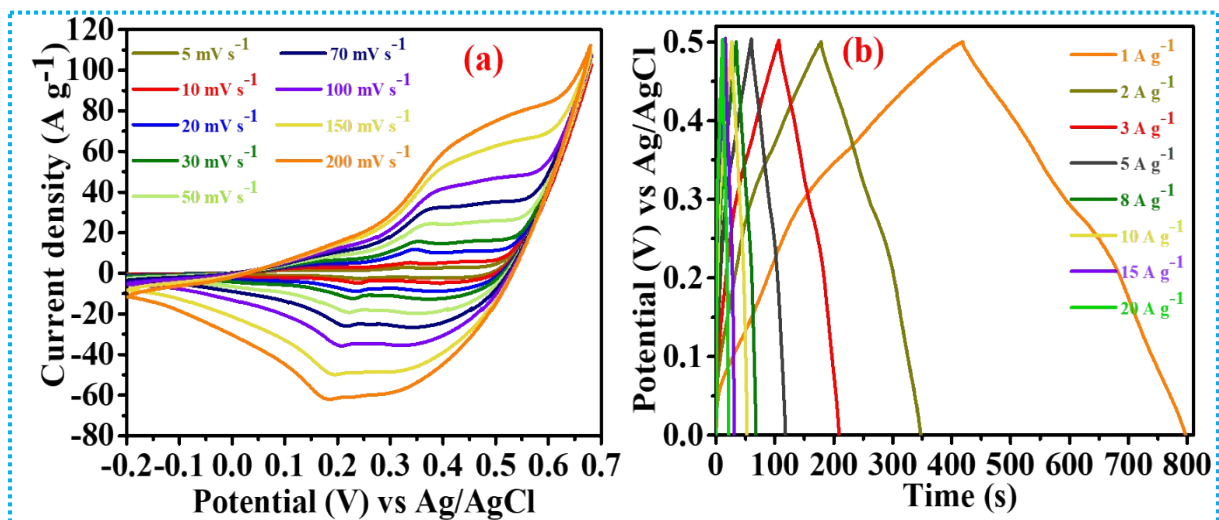

Fig. S6. (a) CV, and (b) GCD profiles of Co-Se@rGO-NF.

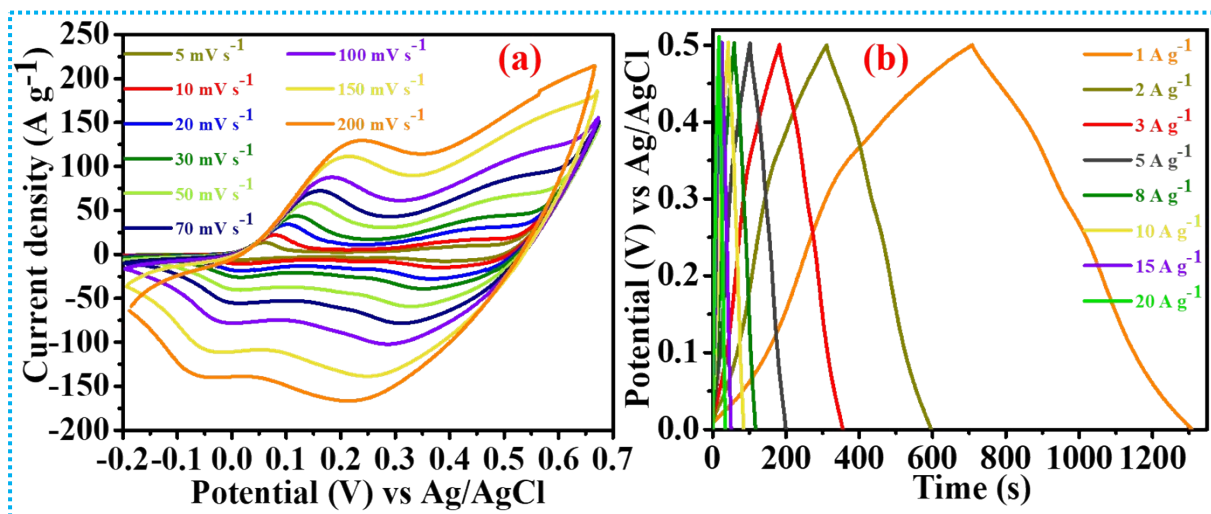

Fig. S7. (a) CV, and (b) GCD profiles of Zn-Co-Se@rGO-NF.



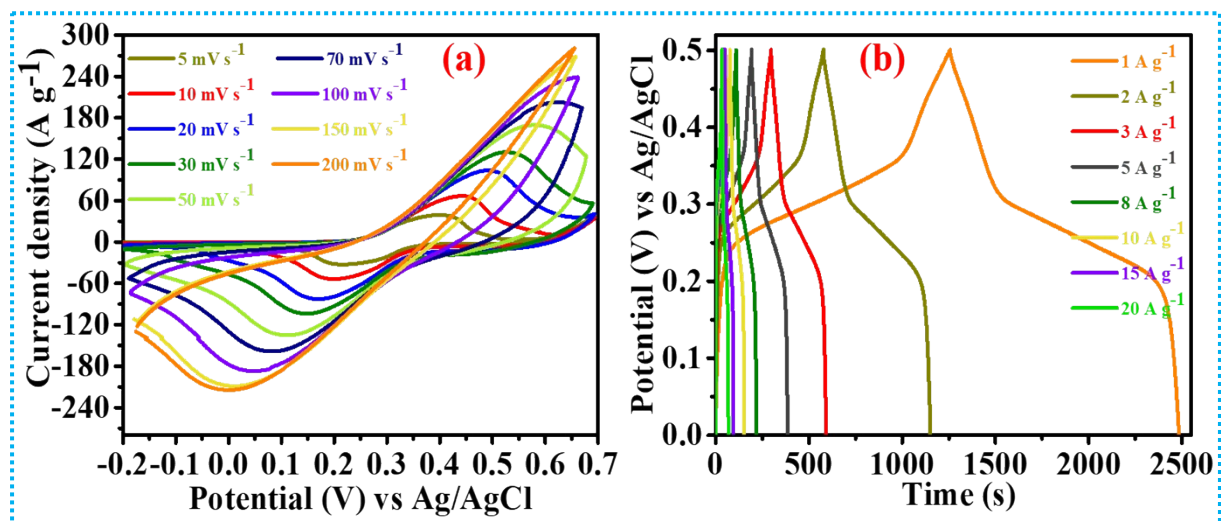

Fig. S8. (a) CV, and (b) GCD profiles of Ni-Co-LDH@rGO-NF.

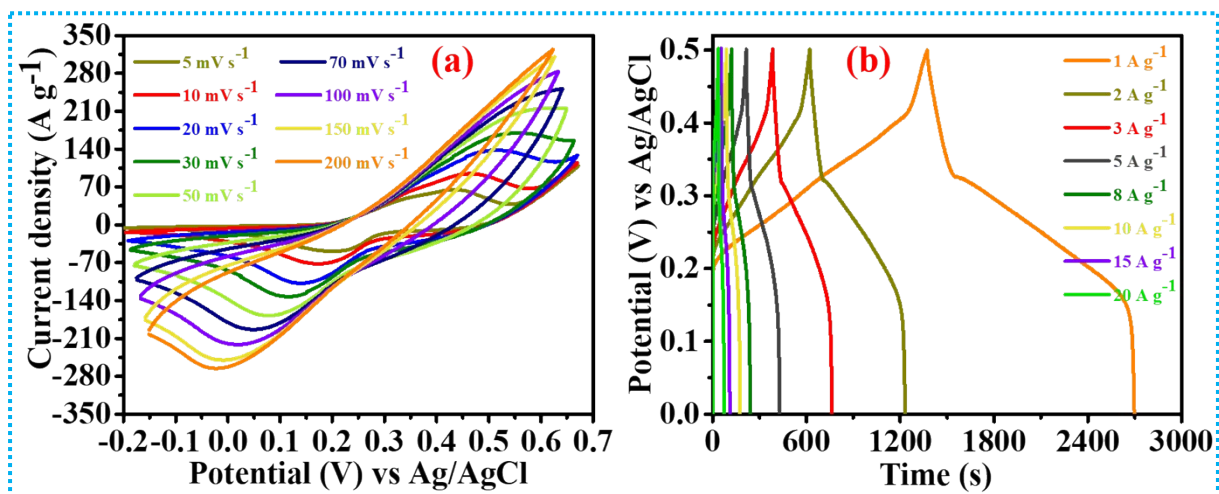

Fig. S9. (a) CV, and (b) GCD profiles of Ni-Zn-Co-LDH@rGO-NF.

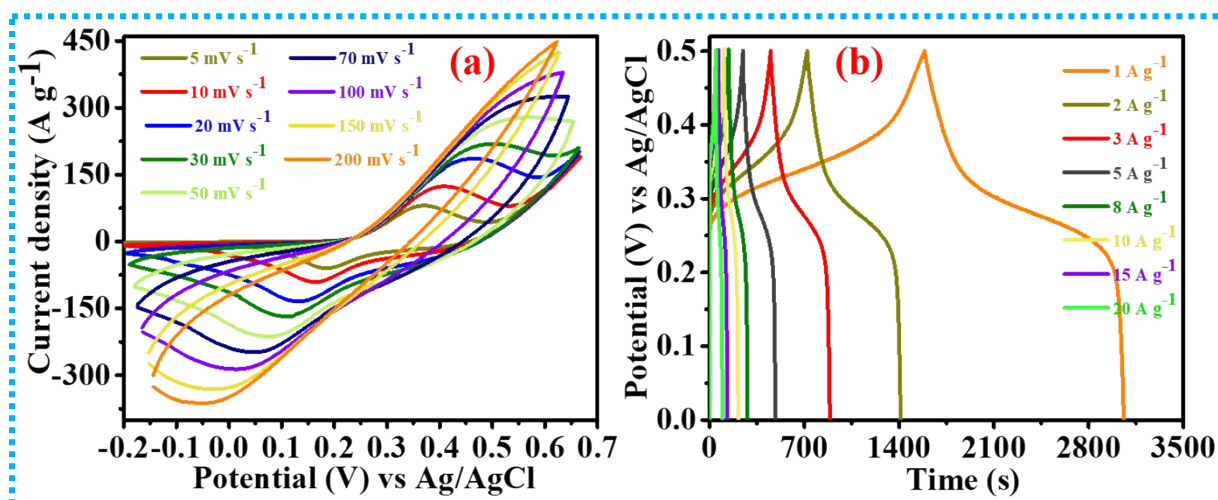

Fig. S10. (a) CV, and (b) GCD profiles of Ni-Co-Se@rGO-NF.

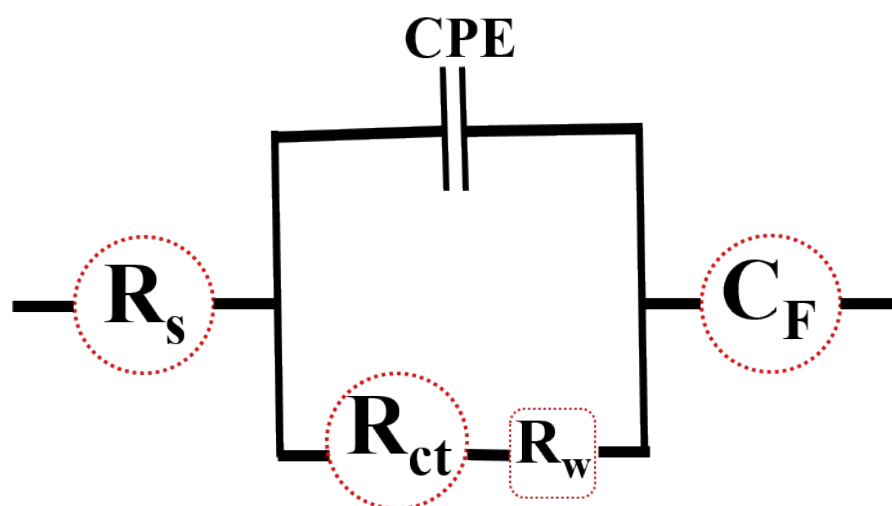

*Fig. S11. Electrochemical equivalent circuit diagram fitted for Nyquist plot of electrode materials.*

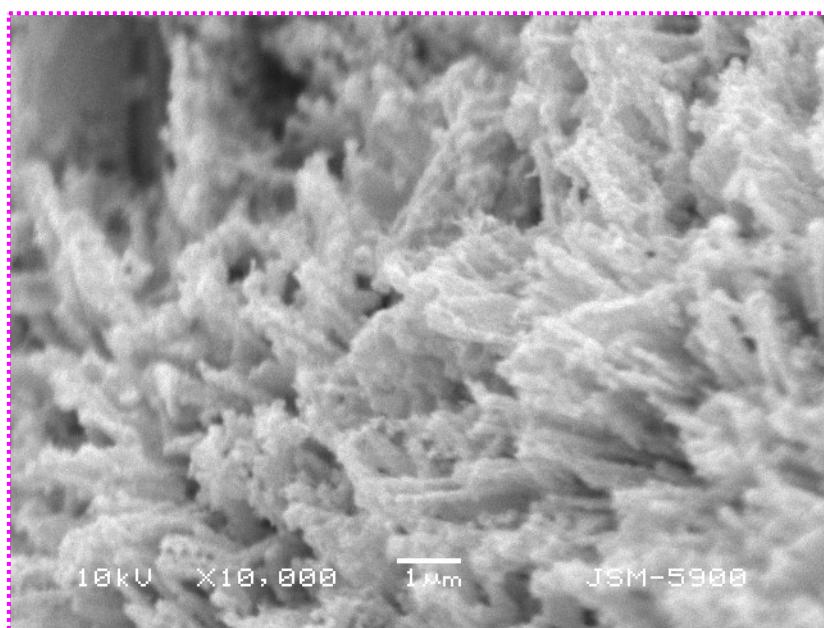

*Fig. S12. FESEM image after cyclic stability.*

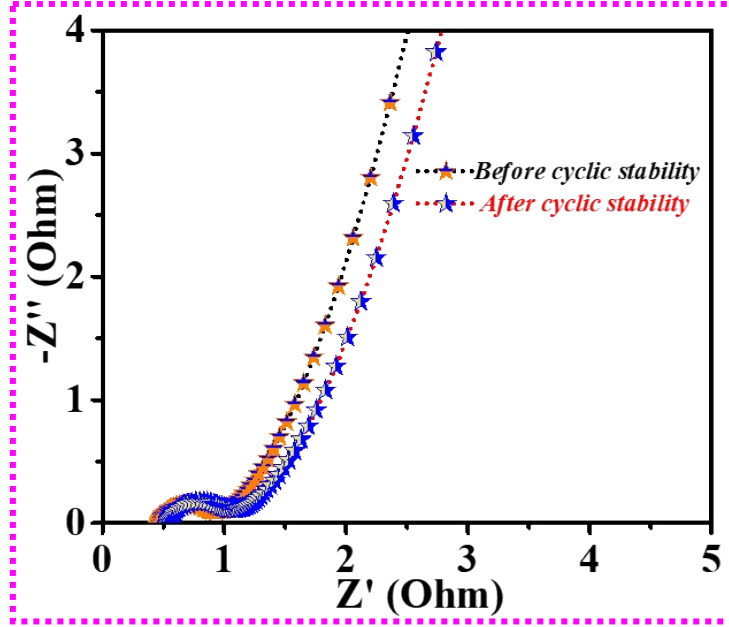

*Fig. S13. EIS analysis of Ni-Zn-Co-Se@rGO-NF before and after the cyclic stability test.*

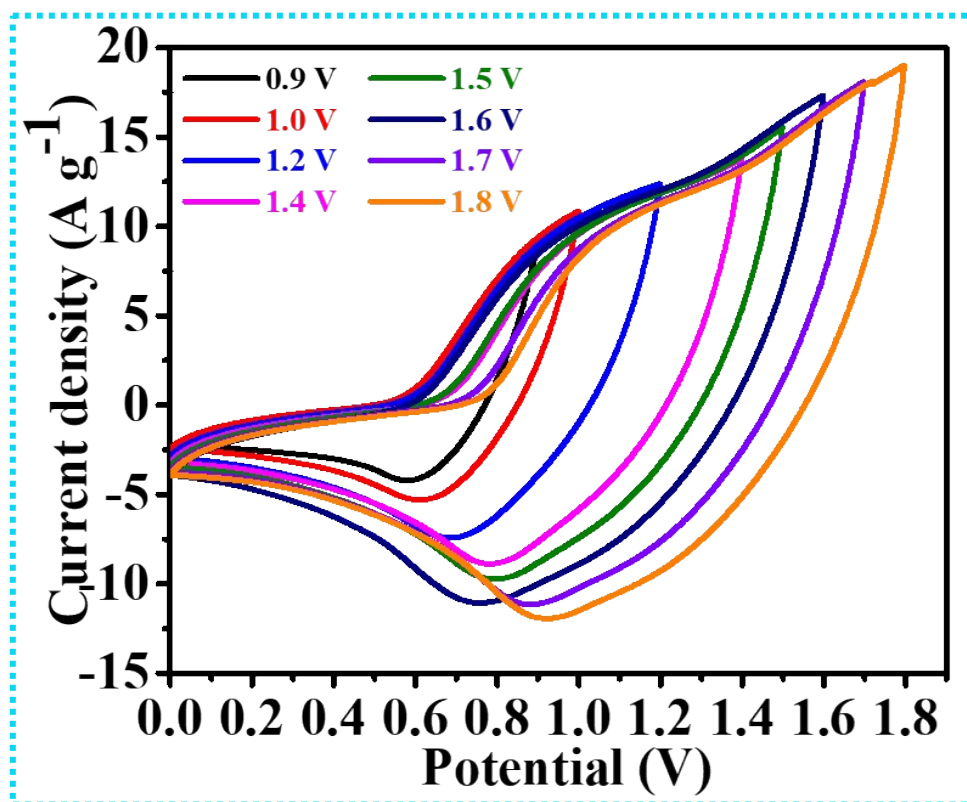

*Fig. S14. CV curves for Ni-Zn-Co-Se@rGO/NF//MDHPC ASC device at various potential window.*
